# Supplementary material for: Mechanism study on the removal of Cd2+ and acetamiprid from wastewater treatment plant effluent by PMS activated by tobacco stem biochar under humic acid induction
Source: Royal Society of Chemistry journal article supplement (doi:10.1039/d5cp00479a), 2025-01-01
Supplement: d5cp00479a1.pdf [file d5cp00479a1.pdf]

## Supporting Information

### **Mechanism study on the removal of Cd<sup>2+</sup> and acetamiprid from wastewater treatment plant effluent by PMS activated by tobacco stem biochar under humic acid induction**

*Xiaojuan Su<sup>a</sup>, Pengfei Gao<sup>a</sup>, Yuanchuan Ren<sup>b,\*</sup>, Jieba Li<sup>a</sup>, Nanqi Ren<sup>c,\*</sup>*

<sup>a</sup> School of Soil and Water Conservation, Southwest Forestry University, Kunming, 650224, China

<sup>b</sup> College of Biological and Chemical Engineering (College of Agriculture), Panzhihua University, Panzhihua, Sichuan, 617000, PR China

<sup>c</sup> School of Environment, Harbin Institute of Technology, Harbin 150090, China

\* Corresponding author

#### **S1. Adsorption isotherm**

In this work, the Langmuir, Freundlich, Temkin and Dubinin-Radushkevich isotherms were used to describe the experimental results in 3.2.6 to explore the adsorption mechanism. The linear equation of the Langmuir (1), Freundlich (2) Temkin (3) and Dubinin-Radushkevich (4) isotherm model

$$q_e = \frac{q_m k_L C_e}{1 + k_L C_e}$$

(1)

$$q_e = k_F C_e^{1/n} \tag{2}$$

$$q_e = \frac{RT}{b} \ln(a C_e)$$

(3)

$$\ln q_e = \ln q_{\max} - K \varepsilon^2 \tag{4}$$

where  $q_e$  and  $q_{\max}$  are the amounts and maximum amounts of Cd (II) adsorbed at equilibrium ( $\text{mg}\cdot\text{g}^{-1}$ ), respectively;  $C_e$  is the equilibrium concentration of adsorbate ( $\text{mg}\cdot\text{L}^{-1}$ );  $K_L$  and  $K_F$  are the Langmuir and Freundlich adsorption coefficient ( $\text{L}\cdot\text{mg}^{-1}$ ), respectively;  $\varepsilon$  is adsorption potential;  $b$  is the Temkin constant ( $\text{J}\cdot\text{mol}^{-1}$ ); and  $a$  is the Temkin equal temperature constant ( $\text{L}\cdot\text{g}^{-1}$ ).

$$R_L = \frac{1}{1 + K_L C_o}$$

(5)

$K_L$  is the Langmuir adsorption coefficient ( $\text{L}\cdot\text{mg}^{-1}$ ),  $C_o$  is the initial concentration of adsorbate ( $\text{mg}\cdot\text{L}^{-1}$ )

## S2. Adsorption kinetics

Pseudo-first-order kinetic model (6), pseudo-second-order kinetic model (7), and intra-particle diffusion (8) were used to perform nonlinear fitting to explore the adsorption kinetics characteristics.

$$q_t = q_e(1 - e^{-K_1 t}) \quad (6)$$

$$q_t = \frac{K_2 q_e^2 t}{1 + K_2 q_e t}$$

(7)

$$q_t = k_3 t^{1/2} + C \quad (8)$$

where  $q_e$  and  $q_t$  are the amounts of  $\text{Cd}^{2+}$  ( $\text{mg g}^{-1}$ ) adsorbed on the adsorbent at equilibrium and time  $t$ , respectively; while  $t$  denotes the adsorption time (min);  $K_1$  represents the pseudo-first-order rate constant ( $\text{min}^{-1}$ );  $K_2$  is the pseudo-second-order rate constant ( $\text{g mg}^{-1}$

min<sup>-1</sup>),  $K_3$  is the intra-particle diffusion rate constant (mg g<sup>-1</sup> min<sup>-1/2</sup>).

### S3. Method for determining pH<sub>PZC</sub>

By potentiometric titration of the catalyst surface, its surface potential can be measured at different pH values. By plotting the relationship curve between surface potential and pH value (zeta pH plot), the pH value corresponding to zero potential can be found, which is the zero point charge.

### S4. Regeneration experiment of materials

Firstly, the used catalyst was subjected to ultrasonic cleaning using ultrapure water, H<sub>2</sub>SO<sub>4</sub> (1mM), and NaOH (1mM) sequentially for 45 minutes to remove impurities and oxides on the surface; Secondly, heat treat the catalyst at 450 °C for 2 hours to remove residual organic compounds and reaction products on the catalyst.

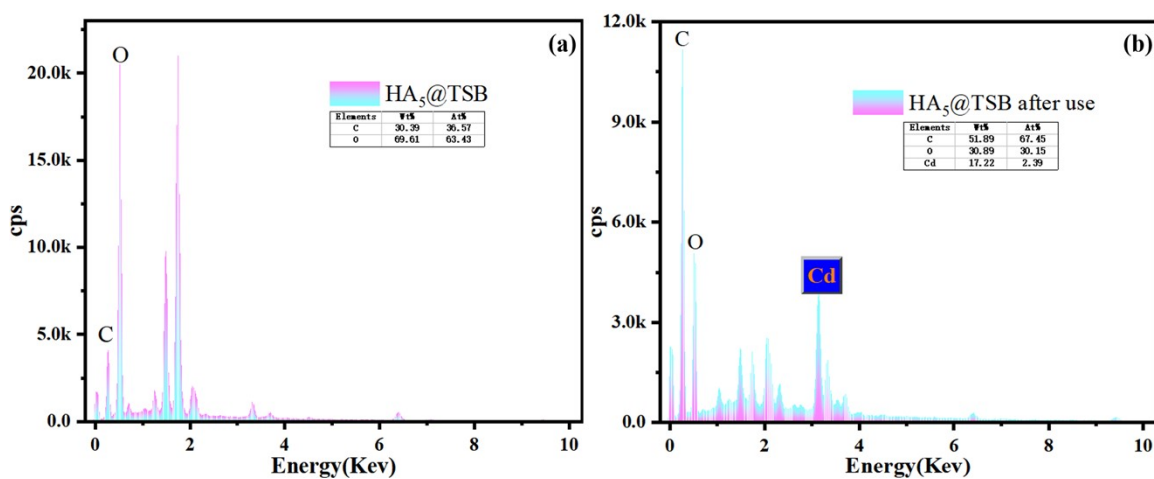

**Fig. S1.** The EDS images of different samples: (a) HA<sub>5</sub>@TSB, (b) HA<sub>5</sub>@TSB after use.

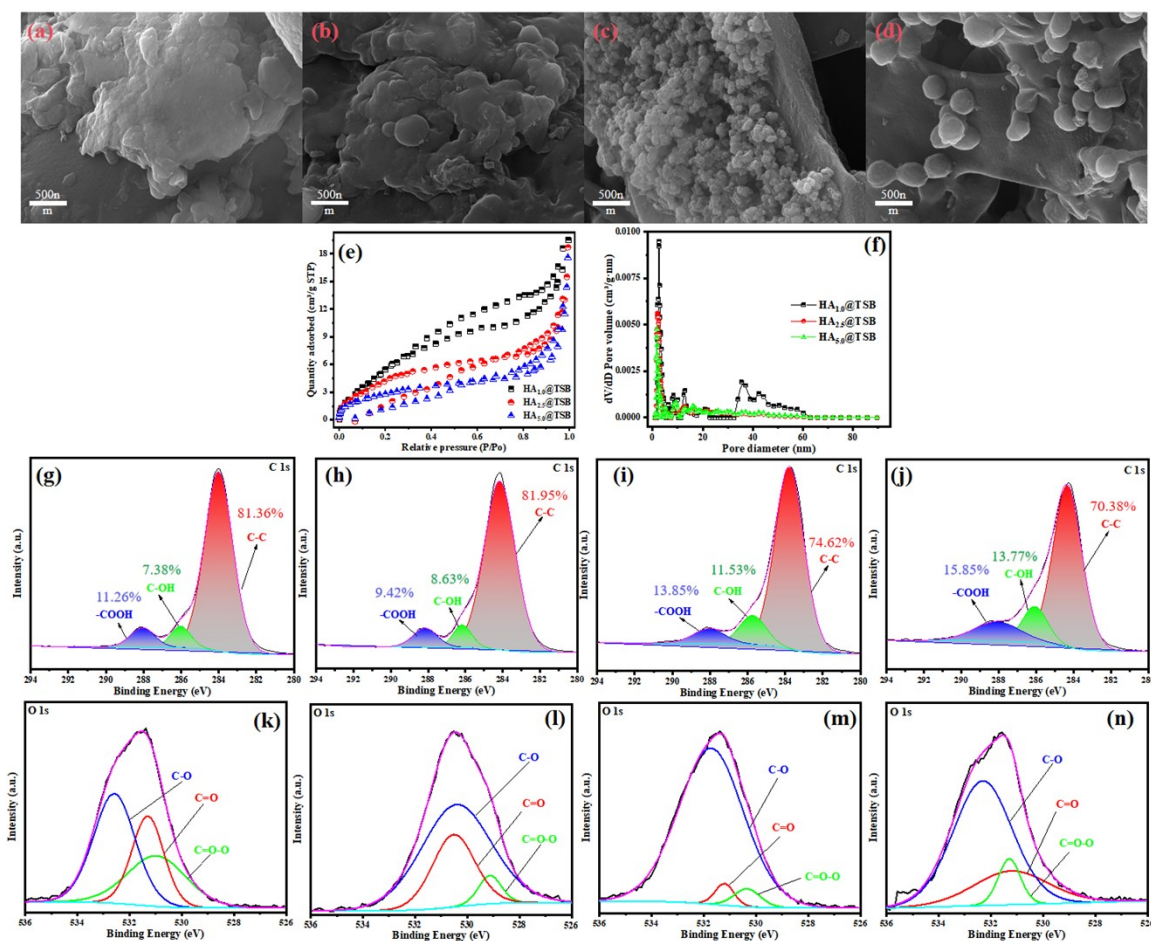

**Fig. S2.** The SEM images of different samples: (a) HA<sub>1</sub>@TSB, (b) HA<sub>2.5</sub>@TSB, (c) HA<sub>5</sub>@TSB, (d) HA<sub>5</sub>@TSB after use. (e) N<sub>2</sub> adsorption-desorption isotherms, (f) corresponding pore size distributions. XPS spectra of HA<sub>x</sub>@TSB before and after use: C 1s spectra of (g) HA<sub>1</sub>@TSB, (h) HA<sub>2.5</sub>@TSB, (i) HA<sub>5</sub>@TSB, (j) HA<sub>5</sub>@TSB after use, O 1s spectra of (k) HA<sub>1</sub>@TSB, (l) HA<sub>2.5</sub>@TSB, (m) HA<sub>5</sub>@TSB, (n) HA<sub>5</sub>@TSB after use.

**Table S1** BET parameters of HA<sub>1</sub>@TSB, HA<sub>2.5</sub>@TSB and HA<sub>5</sub>@TSB.

| Materials              | BET surface area<br>(m <sup>2</sup> /g) | Average pore size<br>(nm) | Total pore volume<br>(cm <sup>3</sup> /g) |
|------------------------|-----------------------------------------|---------------------------|-------------------------------------------|
| HA <sub>1</sub> @TSB   | 63.58                                   | 135.98                    | 0.09                                      |
| HA <sub>2.5</sub> @TSB | 113.67                                  | 124.54                    | 0.14                                      |
| HA <sub>5</sub> @TSB   | 235.88                                  | 68.65                     | 0.25                                      |

**Table S2** During the degradation of Ace by HA<sub>5</sub>@TSB, the intermediate products were identified by LC-MS.

| Compound | m/z | Molecular structure                                | Ball-and-stick models                                                                 |
|----------|-----|----------------------------------------------------|---------------------------------------------------------------------------------------|
| Ace      | 223 | C <sub>10</sub> H <sub>11</sub> ClN <sub>4</sub>   | 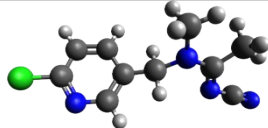    |
| P1       | 239 | C <sub>10</sub> H <sub>11</sub> ClN <sub>4</sub> O |     |
| P2       | 158 | C <sub>6</sub> H <sub>4</sub> ClNO <sub>2</sub>    |    |
| P3       | 174 | C <sub>6</sub> H <sub>4</sub> ClNO <sub>3</sub>    |    |
| P4       | 174 | C <sub>6</sub> H <sub>4</sub> ClNO <sub>3</sub>    |    |
| P5       | 165 | C <sub>6</sub> H <sub>10</sub> ClNO <sub>2</sub>   |   |
| P6       | 239 | C <sub>10</sub> H <sub>11</sub> ClN <sub>4</sub> O |   |
| P7       | 160 | C <sub>6</sub> H <sub>6</sub> ClNO <sub>2</sub>    |  |
| P8       | 158 | C <sub>6</sub> H <sub>4</sub> ClNO <sub>2</sub>    |  |
| P9       | 165 | C <sub>6</sub> H <sub>10</sub> ClNO <sub>2</sub>   |  |
| P10      | 198 | C <sub>9</sub> H <sub>12</sub> ClN <sub>3</sub>    |   |
| P11      | 199 | C <sub>9</sub> H <sub>11</sub> ClN <sub>2</sub> O  |   |

|     |     |                   |                                                                                       |
|-----|-----|-------------------|---------------------------------------------------------------------------------------|
| P12 | 164 | $C_9H_{12}N_2O$   | 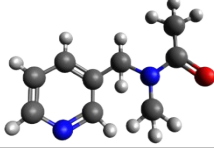   |
| P13 | 166 | $C_8H_{10}N_2O_2$ |     |
| P14 | 136 | $C_6H_8N_2O$      |    |
| P15 | 187 | $C_{10}H_{11}N_4$ |     |
| P16 | 201 | $C_{10}H_9N_4O$   |     |
| P17 | 215 | $C_{10}H_7N_4O_2$ |    |
| P18 | 107 | $C_6H_5NO$        |  |
| P19 | 123 | $C_6H_5NO_2$      |  |
| P20 | 116 | $C_4H_4O_4$       |  |
| P21 | 90  | $C_2H_2O_4$       |  |
| P22 | 59  | $C_2H_5NO$        |  |
| P23 | 89  | $C_2H_3NO_3$      |  |
| P24 | 64  | $C_2H_4O_2$       |  |
| P25 | 46  | $CH_2O_2$         |  |
| P26 | 48  | $CH_4O_2$         |  |
